# Supplementary material for: One Drop | Mobile: An Evaluation of Hemoglobin A1c Improvement Linked to App Engagement
Source: PubMed Central journal article supplement (PMC6238886; doi:10.2196/diabetes.8039), 2017-08-24
Supplement: diabetes_v2i2e21_app1.pdf [file diabetes_v2i2e21_app1.pdf]

**Multimedia Appendix 1.** Tests of mean hemoglobin A<sub>1c</sub> change by time, diabetes type, and their interaction.

|                            | Users with Type 1 or Type 2 Diabetes<br>(N = 1,288) |            |         |         |              |          |            |        |         |              | Users with Type 2 Diabetes<br>(n = 921) |            |        |         |              |
|----------------------------|-----------------------------------------------------|------------|---------|---------|--------------|----------|------------|--------|---------|--------------|-----------------------------------------|------------|--------|---------|--------------|
|                            | Unadjusted                                          |            |         |         |              | Adjusted |            |        |         |              | Adjusted                                |            |        |         |              |
|                            | Est.                                                | Std. Error | F       | p-value | 95% CI       | Est.     | Std. Error | F      | p-value | 95% CI       | Est.                                    | Std. Error | F      | p-value | 95% CI       |
| Intercept                  | 7.62                                                | .04        | 36130.4 | .001    | (7.54, 7.69) | 7.78     | .10        | 6068.4 | .001    | (7.58, 7.98) | 7.52                                    | .11        | 4348.1 | .001    | (7.30, 7.74) |
| Time                       | .53                                                 | .03        | 292.0   | .001    | (.47, .60)   | .53      | .03        | 292.0  | .001    | (.47, .59)   | .64                                     | .03        | 362.5  | .001    | (.57, .70)   |
| Diabetes type              | .12                                                 | .04        | 9.5     | .002    | (.05, .20)   | .15      | .04        | 11.7   | .001    | (.06, .23)   | ---                                     | ---        | ---    | ---     | ---          |
| Time * Diabetes type       | -.10                                                | .03        | 10.5    | .001    | (-.16, -.04) | -.10     | .03        | 10.6   | .001    | (-.16, -.04) | ---                                     | ---        | ---    | ---     | ---          |
| Gender                     |                                                     |            |         |         |              | -.08     | .04        | 3.5    | .061    | (-.16, .00)  | -.08                                    | .05        | 2.6    | .118    | (-.17, .02)  |
| Location                   |                                                     |            |         |         |              | .09      | .05        | 3.1    | .076    | (-.01, .19)  | .05                                     | .06        | .6     | .454    | (-.07, .16)  |
| Diabetes duration in years |                                                     |            |         |         |              | -.00     | .00        | .7     | .405    | (-.01, .01)  | -.01                                    | .01        | 4.1    | .043    | (-.03, -.00) |
| Months between A1c entries |                                                     |            |         |         |              | -.03     | .01        | 5.6    | .018    | (-.06, -.01) | -.04                                    | .02        | 5.4    | .020    | (-.08, -.01) |
| Insulin                    |                                                     |            |         |         |              |          |            |        |         |              | .66                                     | .10        | 45.8   | .001    | (.47, .85)   |

*Note.* Est. = effect estimates, CI = confidence interval. Results of mixed effects repeated measures models are presented.
