# Supplementary material for: One Drop | Mobile: An Evaluation of Hemoglobin A1c Improvement Linked to App Engagement
Source: PubMed Central journal article supplement (PMC6238886; doi:10.2196/diabetes.8039), 2017-08-24
Supplement: diabetes_v2i2e21_app2.pdf [file diabetes_v2i2e21_app2.pdf]

**Multimedia Appendix 2.** Tests of the relationships between tracking food, activity, blood glucose, and medications in One Drop | Mobile and A1c change.

|                            | Users with Type 1 or Type 2 Diabetes<br>(N = 1,288) |            |     |         |             |                            |            |      |         |             |                         |            |      |         |               | Users with Type 2 Diabetes<br>(n = 921) |            |      |         |              |
|----------------------------|-----------------------------------------------------|------------|-----|---------|-------------|----------------------------|------------|------|---------|-------------|-------------------------|------------|------|---------|---------------|-----------------------------------------|------------|------|---------|--------------|
|                            | Unadjusted                                          |            |     |         |             | Adjusted for Diabetes Type |            |      |         |             | Adjusted for Covariates |            |      |         |               | Adjusted for Covariates                 |            |      |         |              |
|                            | B                                                   | Std. Error | F   | P-value | 95% CI      | B                          | Std. Error | F    | P-value | 95% CI      | B                       | Std. Error | F    | P-value | 95% CI        | B                                       | Std. Error | F    | P-value | 95% CI       |
| Food entries               | .39                                                 | .15        | 6.4 | .012    | (.09, .69)  | .44                        | .15        | 8.2  | .004    | (.14, .74)  | .51                     | .15        | 11.6 | .001    | (.22, .81)    | .50                                     | .17        | 8.9  | .003    | (.17, .82)   |
| Activity entries           | .26                                                 | .23        | 1.3 | .26     | (-.17, .68) | .23                        | .23        | .96  | .326    | (-.15, .60) | .28                     | .22        | 1.6  | .209    | (-.16, .72)   | -.09                                    | .27        | 10.9 | .741    | (-.63, .45)  |
| Blood glucose entries      | -.37                                                | .29        | 1.7 | .202    | (-.66, .08) | -.44                       | .29        | 2.3  | .130    | (-.99, .11) | -.60                    | .28        | 4.4  | .036    | (-1.15, -.04) | -.14                                    | .34        | 0.2  | .672    | (-.80, .52)  |
| Medication entries         | -.22                                                | .23        | .94 | .333    | (-.67, .23) | -.20                       | .23        | .74  | .391    | (-.64, .25) | -.24                    | .22        | 1.1  | .288    | (-.64, .20)   | -.13                                    | .25        | 0.3  | .600    | (-.61, .35)  |
| Diabetes type              |                                                     |            |     |         |             | .44                        | .13        | 12.3 | .001    | (.20, .69)  | .05                     | .13        | .18  | .675    | (-.20, .31)   | ---                                     | ---        | ---  | ---     | ---          |
| Gender                     |                                                     |            |     |         |             |                            |            |      |         |             | .38                     | .13        | 9.0  | .003    | (.13, .62)    | .41                                     | .14        | 8.1  | .004    | (.13, .69)   |
| Location                   |                                                     |            |     |         |             |                            |            |      |         |             | .19                     | .15        | 1.6  | .207    | (-.11, .50)   | .10                                     | .19        | .30  | .583    | (-.27, .47)  |
| Diabetes duration in years |                                                     |            |     |         |             |                            |            |      |         |             | -.05                    | .01        | 60.7 | .001    | (-.06, -.04)  | -.07                                    | .01        | 45.8 | .001    | (-.09, -.05) |
| Months between A1c entries |                                                     |            |     |         |             |                            |            |      |         |             | -.08                    | .02        | 13.0 | .001    | (-.13, -.04)  | -.12                                    | .03        | 17.5 | .001    | (-.17, -.06) |
| Insulin                    |                                                     |            |     |         |             |                            |            |      |         |             |                         |            |      |         |               | .39                                     | .15        | 6.9  | .008    | (.10, .68)   |

*Note.* B = unadjusted coefficient, CI = confidence interval. Results of multiple regression models are presented.
